1 **Accessory genome dynamics and structural variation of *Shigella* from persistent**  
2 **infections**

3

4 **Authors:**

5 Rebecca J. Bengtsson<sup>1</sup>, Timothy J. Dallman<sup>2,3</sup>, Claire Jenkins<sup>2</sup>, Hester Allen<sup>2</sup>, P. Malaka De  
6 Silva<sup>1</sup>, George Stenhouse<sup>1</sup>, Caisey V. Pulford<sup>1</sup>, Rebecca J. Bennett<sup>1</sup>, Kate S. Baker<sup>1</sup>

7

8 **Affiliations:**

9 <sup>1</sup> Clinical Infection, Microbiology and Immunity, Institute of Infection, Veterinary and  
10 Ecological Sciences, The University of Liverpool, UK

11 <sup>2</sup> National Infection Service, Public Health England, Colindale, London, UK

12 <sup>3</sup> Division of Infection and Immunity, The Roslin Institute and Royal (Dick) School of  
13 Veterinary Studies, University of Edinburgh, UK

14

15

16 **Corresponding Author:**

17 Kate S. Baker

18 Email: kbaker@liverpool.ac.uk

19

20 **Abstract**

21

22 Shigellosis is a diarrhoeal disease caused mainly by *Shigella flexneri* and *Shigella sonnei*.  
23 Infection from *Shigella* is thought to be largely self-limiting, with short- to medium- term and  
24 serotype-specific immunity provided following clearance. However, cases of men who have  
25 sex with men (MSM) associated shigellosis have been reported where *Shigella* of the same  
26 serotype were serially sampled from individuals between 1 to 1862 days apart, possibly due  
27 to persistent carriage or reinfection with the same serotype. Here, we investigate the

28 accessory genome dynamics of MSM associated *S. flexneri* and *S. sonnei* isolates serially  
29 sampled from individual patients at various days apart. We find that pairs likely associated  
30 with persistent carriage infection and with smaller single nucleotide polymorphism (SNP)  
31 distance, demonstrated significantly less variation in accessory genome content than pairs  
32 likely associated with reinfection and with greater SNP-distance. We also observed evidence  
33 of antimicrobial resistance (AMR) acquisition during persistent *Shigella* infection, specifically  
34 the gain of extended spectrum beta-lactamase genes in two pairs associated with persistent  
35 carriage. Finally, we explored chromosomal structural variations and rearrangements in seven  
36 (5 chronic and 2 reinfection associated) pairs of *S. flexneri* 3a isolates from a MSM-associated  
37 epidemic sublineage, which revealed variations at several common regions across pairs.  
38 These variations were mediated by insertion sequence (IS) elements which facilitated  
39 plasticity of genetic material with a distinct predicted functional profile. This study provides  
40 insight on the variation of accessory genome dynamics and large structural genomic changes  
41 in *Shigella* during persistent infection.

42

### 43 **Importance**

44

45 *Shigella* spp are Gram-negative bacteria that are the etiological agent of shigellosis, the  
46 second most common cause of diarrhoeal illness globally, particularly among children under  
47 the age of 5 in low-income countries. In high-income countries, an alternative transmission  
48 pathway of sexually transmissible disease among men who have sex with men (MSM) is  
49 emerging as the dominant presentation of the disease. Within MSM we have captured  
50 prolonged infection and/or recurrent infection with shigellae of the same serotype, challenging  
51 the belief that *Shigella* infection is short-lived, and confers homologous serotypic immunity.  
52 Using this recently-emerged transmission scenario we comprehensively characterise the  
53 genomic changes that occur over the course of individual infection with *Shigella* and uncover  
54 a distinct functional profile of variable genome regions in these globally important pathogens.

55

## 56 **Introduction**

57

58 Shigellosis is a faecal-orally transmitted disease that is characterised by dysentery and severe  
59 colitis. The causative agent is the Gram-negative bacteria *Shigella* spp. *S. flexneri* and *S.*  
60 *sonnei* contribute to the greatest disease burden of shigellosis globally, are among the leading  
61 cause of moderate-to-severe diarrhoea in children under the age of five in low-income  
62 countries (1). In high-income countries, cases are often linked to foreign travel and can be  
63 sexually transmitted among GBMSM, evidenced by an increase in the number of domestically-  
64 acquired infection cases among adult males (2-4).

65

66 The current recommended treatment for shigellosis is ciprofloxacin. However, *Shigella* spp  
67 with chromosomal mutations in the Quinolone Resistance Determining Region (QRDR)  
68 conferring resistance to fluoroquinolones, are now widely geographically distributed (5, 6) and  
69 have been reported in MSM-associated outbreaks (4, 7, 8). Genomic epidemiological analysis  
70 has previously shown that horizontal acquisition of a single azithromycin resistance plasmid,  
71 pKSR100, facilitated the epidemic emergence of MSM-associated shigellae in 2012 and  
72 enhanced its spread (9). Over the recent years, increase in MSM shigellosis in the UK has  
73 been attributable to a novel *S. sonnei* clade exhibiting ciprofloxacin and macrolide resistance,  
74 conferred by triple QRDR mutations and the acquisition of pKSR100, respectively (10). Thus,  
75 MSM-associated shigellosis is an emerging problem that is intimately associated with  
76 increasing AMR (2).

77

78 In addition to AMR, coinfection with HIV may lead to further complications and can be a risk  
79 factor for sustaining ongoing transmission within the MSM community (11, 12). *Shigella*  
80 infection is typically self-limiting (infection time ranging between 1 to 4 weeks) and following  
81 clearance immunity is acquired against subsequent infection with the homologous serotype

82 (13). The conferred length of protection is thought to last approximately 5 months to 2 years  
83 (14, 15). However, persistent infection has been reported among MSM and coinfection with  
84 HIV could be a contributing factor, altering individual immune statuses and causing prolonged  
85 infection times, relapse or re-infection of immunocompromised individual with the same  
86 serotype (2, 16). Due to its rarity, little is known regarding persistent *Shigella* infection and it  
87 remains poorly characterized. The intensification of MSM-associated shigellosis in England  
88 over recent years has provided a diverse dataset of *Shigella* isolate pairs serially sampled  
89 from individual male patients reporting domestically acquired infection across several  
90 serotypes (*S. flexneri* 3a, *S. flexneri* 2a and *S. sonnei*) (17). Previous analysis of these pairs  
91 revealed SNP distances between such paired isolates increased with time between sampling  
92 and demonstrated patterns of long-term carriage or recurrent infection, with either the same  
93 or different serotypes (17).

94

95 Here, we extend previous SNP based comparisons among serially isolated *Shigella* pairs ( $n=$   
96 58 pairs) and perform detailed comparative analyses to investigate genomic changes in  
97 shigellae over the course of infection. We characterise accessory genome dynamics, including  
98 the gain and loss of AMR determinants, compare and contrast these changes between pairs  
99 that represent long-term carriage to those that arose from reinfection. We then further deepen  
100 the study to compare large-scale structural variation across the *Shigella* chromosome through  
101 long-read sequencing of a subset of pairs ( $n=7$  pairs). In doing so, we generated a high-quality  
102 reference genome and publicly accessioned an isolate of a globally important pathogenic *S.*  
103 *flexneri* 3a. We also identified unique functional signatures in variable regions of the  
104 chromosome, providing a snapshot into the genome changes that occur over the course of  
105 infection.

## 106 **Materials and Methods**

107

108 *Isolates with routinely generated Illumina sequencing data*

109

110 Whole genome sequencing data of *Shigella* isolates ( $n=116$ ) were generated as part of routine  
111 national surveillance by Public Health England (18, 19). Each patient was sampled at two time  
112 points ranging from 1 to 1,862 days apart for *S. flexneri* and 1 to 1,353 days apart for *S. sonnei*.  
113 In total, the dataset consists of 35 pairs of *S. flexneri* (19 paired *S. flexneri* 2a and 15 paired  
114 *S. flexneri* 3a) and 23 pairs of *S. sonnei* (Table 1). All 68 *S. flexneri* and over half of *S. sonnei*  
115 (28/46) isolates belonged to previously described epidemic MSM-associated lineages (2, 9).  
116 As established by Hester *et al*, we define a pair of isolates serially sampled from the same  
117 patient at time points ranging 1 to 176 days with genetic distance ranging between 0 to 7  
118 SNPs, as likely associated with long-term carriage, and pairs of isolates serially sampled  
119 between 34 to 2,636 days with genetic distances of 10 to 1,462 SNPs, as likely associated  
120 with re-infection (17). Here, we simplify these nomenclatures as ‘carriage associated’ and ‘re-  
121 infection associated’ isolate pairs. Using these definitions, the dataset used for analysis  
122 comprised of 22 carriage associated and 12 reinfection associated pairs for *S. flexneri*, and  
123 15 carriage associated and 8 reinfection associated pairs of *S. sonnei* (Table 1). Further  
124 details regarding individual isolates used in this study and the Sequence Read Archive (SRA)  
125 accession numbers are listed in Table S1.

126

127 *Extension study of S. flexneri 3a isolates including long-read sequenced isolates*

128

129 Sixteen epidemic sublineage MSM-associated *S. flexneri* 3a isolates (2) were used to  
130 determine large structural variation and genome rearrangement of *Shigella* over time. These  
131 isolates were serially isolated from eight individuals between 9 to 911 days apart and were  
132 sequenced with both Illumina and PacBio technologies (Figure 3A and 3B). For one patient  
133 (sampled with 154 days interval), PacBio sequencing was only successful for the earlier  
134 isolate. Illumina sequencing for the isolates were generated at the Wellcome Trust Sanger  
135 Institute, as previously described (2). For this study, the 16 isolates were revived from the

136 Gastrointestinal Bacterial Reference Unit reference laboratory archives and DNA extracted for  
137 long read sequencing as previously described (9). DNA from each sample was sequenced on  
138 a Pacific Biosciences RS Sequel at the Centre for Genomics Research at the Institute for  
139 Integrative Biology, University of Liverpool.

140

141 To facilitate understanding, the isolates and near-complete genome assemblies in this  
142 extension study have been abbreviated to meaningful titles to reflect the epidemiology and  
143 sequencing technology employed. These names comprise: the number of intervening days  
144 between serial isolations, time point (A or B, being earlier and later time points respectively)  
145 and sequencing technology (Illumina [I] or PacBio[P]) (Figure 3B). For example, 20BP is the  
146 PacBio-sequenced genome of the second isolate taken from a patient whose isolates were  
147 sampled 20 days apart. The full key and genome accession numbers are provided in  
148 Supplementary Table 2.

149

#### 150 *Sequence processing and assembly*

151

152 Illumina sequencing data was adapter- and quality- trimmed using Trimmomatic v0.38 (20)  
153 and draft genomes were assembled using Unicycler v0.4.7 (21). PacBio data was assembled  
154 using canu version 1.6 (22) and iteratively polished using SMRT tool (Arrow) version v6.0.0  
155 (<https://github.com/PacificBiosciences/GenomicConsensus>). This generated genomes with a  
156 variable number of contigs (between 3 and 17, mode 6). These draft genomes were re-ordered  
157 against the completed reference genome (below) manually using a combination of pairwise  
158 all-by-all Basic Local Alignment Search Tool (BLAST) and bedtools v2.27.1 (23).

159

#### 160 *Generation of a public isolate and complete genome of an internationally important pathogen*

161

162 For one PacBio sequenced genome (20BP), three contiguous sequences were generated that  
163 corresponded to the bacterial chromosome, virulence plasmid and pKSR100 resistance  
164 plasmid. To complete this genome, circularisation at *dnaA* was achieved manually by self-  
165 BLAST and removal of inverted repeat regions using bedtools. As this belonged to an  
166 internationally important pathogen, the cognate isolate has also been deposited at the  
167 National Collection for Type Cultures (NCTC) under accession number **xxxxxx** <awaiting  
168 accession>. Complete genome of 20BP was cut and linearized at *dnaA*, this was then used  
169 as a reference for downstream analyses.

170

#### 171 *Pangenome and pairwise homologous sequence search*

172

173 All assembled draft genomes were annotated using Prokka v1.13.3 (24) and pangenome  
174 analyses were performed using Roary v3.12.0 (25), run without splitting paralogs. To  
175 determine gain and loss of genes, pairwise homologous sequence search was carried out  
176 using Roary between pairs serially isolated from individual patients at two time points.  
177 Accessory genes present in the first isolate and absent in the second were classified as lost,  
178 while genes absent in the first isolate and present in the second were classified as gained. To  
179 account for variations of gained/lost genes contributed by misassembly and inaccurate  
180 annotation, seven synthetic read sets of lengths 36 - 90bp and variable insert sizes  
181 (Supplementary Table 3) were generated from each of the complete genomes of *S. flexneri*  
182 20BP and *S. sonnei* Ss046 (GenBank assembly accession: GCA\_000092525.1) using the  
183 randomreads.sh script from the BBMap package (26). These synthetic read sets were then  
184 assembled, annotated and underwent pairwise comparisons (as above). Comprehensive  
185 pairwise comparisons were ran among the seven synthetic draft genomes generated from  
186 each reference genome. By which, each genome assembled from a particular read length  
187 were individually compared to the six genomes assembled at various lengths, generating a  
188 total of 42 pairwise comparison for each species.

189

190 *Detection of previously characterised accessory genome elements*

191

192 The presence of genetic determinants conferring AMR were detected using AMRFinder  
193 v3.1.1b (27). Plasmids were identified in genome assemblies through screening for plasmid  
194 amplicons using PlasmidFinder with >98% sequence identity and 100% query coverage (28).  
195 Presence and absence of the pKSR100, pCERC1, spA plasmid were confirmed using short  
196 read mapping with BWA mem against the pKSR100 from *S. flexneri* 20BP, pCERC1 from *E.*  
197 *coli* S1.2.T2R (Genbank accession JN012467) and spA from *S. sonnei* Ss046 (Genbank  
198 accession CP000641) (29). Mapping of more than >90% sequence coverage across the  
199 reference were defined as present. Further mobile elements were identified by BLAST of  
200 contiguous sequences using MegaBlast against the NCBI non-redundant database. Phage  
201 elements in the 20BP reference genome were predicted using PHASTER (30).

202

203 *Core SNP distances and phylogenetic inference*

204

205 In order to measure the genetic distances between each pair of isolates sequenced from  
206 MSM-associated *S. flexneri* 3a epidemic sublineage, pairwise SNP distances were  
207 ascertained as previously described (2) with the following exceptions. The reference genome  
208 used was 20BP along with its associated virulence and resistance plasmid. The short-read  
209 Illumina data was mapped directly and the PacBio draft assemblies were shredded to  
210 simulated data of 100bp in length with a 250bp insert size every three bases along a circular  
211 chromosome, as previously described (9), before mapping as for Illumina data.

212

213 *Structural rearrangements and functional annotation*

214

215 In order to detect structural variations and genome rearrangement among pairs, the Synteny  
216 and Rearrangement Identifier (SyRI) package was used. First, the 14 PacBio assembled draft



217 genomes were reordered against the complete reference genome of 20BP using chrorder, part  
218 of the SyRI software package (31). Then, using the NUCmer utility, reordered genomes were  
219 individually aligned against 20BP reference genome, alignment coordinates generated were  
220 then used as input for SyRI to detect structural variation between isolate pairs. The output of  
221 SyRI was compared between the two isolates in each pair, common variations (detected in  
222 both isolates) suggested inter-isolate variation of the pair with the reference genome, whereas  
223 unique variations (detected in one of the isolate pairs) suggested intra-isolate variations.  
224 Insertions and inversions detected by SyRI were evaluated by visualizing pairwise comparison  
225 of PacBio draft assemblies using Artemis Comparison Tools (32). Mapping of short- and long-  
226 reads at regions of intra-isolate variation was performed to confirm duplications and deletions  
227 detected by SyRI and verified manually using Artemis visualisation of coverage at the region  
228 (33). Where consistency between short and long-read mapping was found, a true biological  
229 structural variation between isolate pairs was indicated. However, discrepancies between  
230 short and long read mappings may suggest variation introduced by different sequencing  
231 technologies or through the difference between revived DNA preparations of the same isolate  
232 (Figure 3A). Coordinates of the structural variants identified among the seven *S. flexneri* 3a  
233 pairs (according to the location of the 20BP reference genome) were parsed to Circos for  
234 visualization (34).

235

236 To explore the functional features of the structural variable genomic regions, locations of the  
237 variable regions borders were identified along the 20BP chromosome, and genome  
238 sequences were manually checked for IS elements, as identified using ISEScan (35).  
239 Functional assignment of the Gene Ontology (GO) category for genes in the 20 BP reference  
240 chromosome was predicted using RAST (36), which annotates CDS by comparison to the  
241 curated FIGfams protein families database (37) and assigns genes into different functional  
242 categories.

243

244 *Statistical analyses*

245

246 All statistical analyses were performed using R language v3.6.1. Statistical differences  
247 between accessory gene content variation among isolate pair classification groups (i.e.  
248 carriage vs. reinfection and data vs. control) were tested using the Mann-Whitney U test (38)  
249 using the `wilcox.test()` function. Linear regression analysis of SNP distance against gene  
250 content variation among isolate pairs was performed using the `lm()` function . The correlation  
251 between gene content variation and SNP distance was tested using the Spearman's rank  
252 correlation coefficient using the `cor.test()` function. Statistical difference in the proportion of  
253 genes in each GO category was tested using Chi-square tests with the `chisq.test()` function  
254 and using the raw values.

255

256 *Data availability*

257

258 All data have been deposited in the European Nucleotide Archive under the study accession  
259 number PRJEB39785 with individual isolate accessions listed in Table S1.

260

261 **Results**

262

263 *Change in accessory genome over time among carriage and reinfection isolate pairs*

264

265 Here we defined carriage and reinfection associated pairs based on SNP distance and isolate  
266 pair serial sampling time interval, according to previous definitions (see methods). In order to  
267 extend our understanding of the accessory genome dynamics during the course of *Shigella*  
268 infection, we examined the difference in gene contents between pairs of carriage and  
269 reinfection associated isolates. First, we assessed the correlation between SNP distances and  
270 gene content variation, which was positive and statistically significant for both species,

271 although the association is stronger for *S. sonnei* ( $r = 0.80$ , Spearman's rank correlation  
272 coefficient) than *S. flexneri* ( $r = 0.56$ ). (Figure 1). This indicated that gene content variation  
273 increases as the genetic distance between a pair of serially sampled isolates increases.

274

275 Then, we examined the effect of pair class (i.e. carriage or reinfection associated) on the level  
276 of accessory genome variation and disentangled the variations contributed by gain and loss  
277 events (Figure 2). Here, we define 'gained' as genes present in the later and absent in the  
278 earlier isolates of a pair, and vice versa for 'lost'. This revealed the number of genes gained  
279 ranged from 5 to 93 (median = 21) and genes lost from 0 to 123 (median = 21) for *S. flexneri*  
280 carriage associated pairs (Figure 2). This was lower than the number of genes gained among  
281 *S. flexneri* reinfection associated pairs, which ranged from 9 to 213 (median = 82) and genes  
282 lost from 7 to 116 (median = 48). A similar relationship was seen for *S. sonnei*, where for  
283 carriage associated pairs, the number of genes gained ranged from 4 to 91 (median = 28) and  
284 genes lost from 4 to 176 (median = 24). For *S. sonnei* reinfection associated pairs, the number  
285 of genes gained ranged from 47 to 597 (median = 163) and genes lost ranged 57 to 182  
286 (median = 141). For both species, the distribution of gene content variation between carriage  
287 associated pairs was significantly different to reinfection associated pairs for the number of  
288 genes gained (*S. flexneri*  $p = 0.11e-03$  and *S. sonnei*  $p = 0.88e-03$ , Mann Whitney U test) and  
289 genes lost (*S. flexneri*  $p = 0.03$  and *S. sonnei*  $p = 0.003$ ) (Figure 2).

290

291 As an important control for assessing whether the distribution of gene content variation for  
292 carriage associated pairs was biological in origin (rather than the result of stochastic variation  
293 in genome assembly, annotation and clustering) (Figure 2), we assembled genomes from  
294 synthetic read sets of varied length and insert size, generated from reference genomes, and  
295 performed pairwise homologous sequence comparison, similarly to above. Annotation of the  
296 synthetic genomes revealed variation in the number of coding sequences (CDS) ranged from  
297 4215 – 4234 for *S. flexneri* 3a (20BP) and 4228 – 4247 for *S. sonnei* (Ss046) (Supplementary  
298 Table 3). Additionally, pairwise comparisons of the synthetic genomes generated substantial

299 gene content variation (Figure 2). Specifically, for *S. flexneri*, the number of genes gained  
300 among *in silico* replicates of the same genome, ranged between 5 to 39 (median = 18) and  
301 genes lost between 5 to 39 (median = 16). For *S. sonnei* the number of genes gained ranged  
302 from 2 to 28 (median = 8) and genes lost from between 2 to 28 (median = 10). The gene  
303 content variation distributions generated from *in silico* genome replicates acted as controls  
304 and were statistically compared with the distribution among carriage pairs. This revealed a  
305 significant difference for the number of genes gained ( $p = 0.16e-03$ ) and lost ( $p = 0.79e-03$ )  
306 between *S. sonnei* carriage associated pairs and the *in silico* control (Figure 2), indicating true  
307 biological variation between carriage associated pairs. Whereas for *S. flexneri*, there was no  
308 indication of statistically significant differences in genes gained ( $p = 0.74$ ) or lost ( $p = 0.31$ )  
309 between carriage associated pairs and *in silico* controls, indicating that variations observed  
310 between isolates in carriage pairs were likely stochastic variations due to artefact. Gene  
311 content variation between reinfection associated pairs and *in silico* controls were significantly  
312 different ( $p \leq 0.90e-05$ ) for both *S. flexneri* and *S. sonnei* reinfection pairs (Figure 2).

313

#### 314 *Gain/loss of AMR genes and known MGEs*

315

316 As AMR is increasingly developing among *Shigella spp* in MSM, we screened for changes in  
317 genetic determinants that confer resistance, including horizontally acquired genes and point  
318 mutations. We also assessed for the presence of resistance determinants previously  
319 associated with MSM-associated *Shigella*. In particular, the presence of the pKSR100 plasmid  
320 which carries AMR genes conferring high-level resistance to azithromycin and associated with  
321 driving the success of MSM-associated *Shigella* sublineages (2, 4, 9). As expected, all *S.*  
322 *flexneri* and *S. sonnei* isolates within the dataset were multidrug resistant, harbouring genetic  
323 determinants conferring resistance to three or more antimicrobial classes (Supplementary  
324 Table 4). When using short-read mapping to confirm presence of plasmids, we found the  
325 majority of *S. flexneri* isolates carried the *Shigella*-Resistance Locus Multi-Drug Resistance  
326 Element (SRL-MDRE) (64/68) and the pKSR100 plasmid (55/68), with only five isolates

327 carrying the pCERC1 plasmid. For *S. sonnei*, all isolates carried the transposon Tn7 and class  
328 II integrons (In2) with the majority (30/46) of isolates also carrying the spA plasmid and 43%  
329 (20/46) of isolates carrying the pKSR100 plasmid. The high AMR rates observed here reflect  
330 the known mobile genetic element content for UK *S. flexneri* and *S. sonnei*.

331

332 To look at changes in AMR over time, we explored what AMR genes were gained and lost  
333 over the course of *Shigella* infection. Here, we have applied the same working definition of  
334 gained and lost as previously mentioned. This revealed discrepancies in acquired AMR genes  
335 for 10 *S. flexneri* and 8 *S. sonnei* pairs, in line with population level trends (Table 2).  
336 Differences in AMR genes were observed between carriage and reinfection associated pairs  
337 for both species, often associated with the pKSR100 plasmid being acquired in reinfection  
338 pairs. Whereas, AMR genes associated with the pCERC1 plasmid were lost in carriage  
339 associated pairs. These individual trends of pKSR100 gain and pCERC1 loss are consistent  
340 with observations across MSM-associated shigellae (2, 9). Concerningly, there was evidence  
341 of AMR gain in two carriage associated pairs, with the extended beta-lactamase gene  
342 *blaSHV<sub>12</sub>* being acquired by an *S. flexneri* 2a (Case ID I) pair and *blaTEM<sub>1</sub>* in an *S. sonnei* pair  
343 (Case ID L) (Table 2), suggesting the possibility of AMR acquisition during persistent infection.  
344 A BLASTn search of the 52,219bp contiguous sequence carrying the *blaTEM<sub>1</sub>* gene revealed  
345 86% coverage and 99% identity with an *E. coli* O182:H21 plasmid (GeneBank accession:  
346 CP024250.1). The length of the contig carrying *blaSHV<sub>12</sub>* spanned only the length of the gene,  
347 thus we were unable to reconstruct the full genetic context of this resistance gene and identify  
348 its origin.

349

350 Point mutations in the QRDR were identified in 29/46 (63%) *S. sonnei* isolates, 19 of which  
351 were triple mutations (*gyrA* S83L, *gyrA* S87G, *parC* S80I) known to confer resistance against  
352 ciprofloxacin, and 10 with single mutation (*gyrA* S83L and D87G) conferring reduced  
353 susceptibility (Supplementary Table 4). Single *gyrA* S83L mutations were detected in two *S.*

354 *flexneri* 3a isolates. Although the rates of quinolone resistance were moderate in *S. sonnei*  
355 and low in *S. flexneri*, there was no sign of *de novo* mutation in the QRDR region over the  
356 course of infection as we did not observe any isolate pairs with the same genotype (i.e carriage  
357 associated pairs) acquiring mutations in later isolates.

358

359 *Generation of an important MSM-associated S. flexneri 3a isolate reference genome and the*  
360 *establishment of carriage/reinfection associated pairs*

361

362 To determine structural variation and genome rearrangement of *S. flexneri* over time, we  
363 PacBio sequenced 16 isolates from an epidemic sublineage of MSM-associated *S. flexneri*  
364 3a, serially isolated from eight individuals at time intervals of 9 to 911 days apart (Figure 3A  
365 and 3B). Notably, Illumina data from these isolates were already available from a previous  
366 study (2). In the process, a complete genome for isolate 20BP was generated, which  
367 comprised of a chromosome of 4,522,047bp, the virulence plasmid of 231,165bp and the  
368 pKSR1000 plasmid of 72,593bp. This complete genome was used as a high-quality reference  
369 genome for further analyses and has been deposited under accession number  
370 GCA\_904066025 in NCBI.

371

372 Genetic distances of the eight isolate pairs sampled at various time intervals ranged from 0 to  
373 135 SNPs apart (Figure 3C). Generally, SNP distances between pairs increased with time  
374 interval between serial isolations. This was consistent with the previously established  
375 epidemiological definitions, and the same definition of carriage and reinfection associated  
376 pairs was applied (see methods). As PacBio sequencing of isolate 154BP failed (Figure 3B),  
377 there were in total long-read sequenced genomes for seven serial isolate pairs; five carriage  
378 and two reinfection associated pairs. SNP distances between replicate sequencing of  
379 individual isolates using PacBio and Illumina (e.g. between 9AI and 9AP) were equivocal, with  
380 variation contributed by different sequencing preparations being 0 to 5 SNPs apart (Figure  
381 3C).

382

383 *Large-scale variation of S. flexneri genome over time*

384

385

386 To detect structural rearrangements among the seven pairs of *S. flexneri* 3a, we aligned all  
387 PacBio sequenced genomes against the high-quality reference genome of 20BP and  
388 assessed discrepancies between each pair. We identified a total of 34 structural variations in  
389 the 7 pairs of isolates across 14 genomic regions, including 9 copy deletions, 7 insertions, 7  
390 duplications, 5 inversions, 4 deletions, 1 translocation and 1 translocation inversion (Figure  
391 4A). Three structural variants were less than 1,500bp and mapped to IS elements. We  
392 analysed sequences at the borders of the remaining 31 variants to determine possible  
393 mechanisms facilitating the rearrangements. This revealed 15 variants had occurred through  
394 recombination between homologous IS copies and two variants had occurred through  
395 recombination between ribosomal operons (Supplementary Table 5). Of the remaining 14  
396 variants, 7 possessed IS sequence in only one end. We did not detect presence of repeat  
397 sequences or IS elements at the borders of the remaining 7 variants, thus rearrangements  
398 have been facilitated by an unknown mechanism.

399

400 A total of 1,791 genes were found within the genomic regions of structural variations and  
401 rearrangements. In order to see if particular gene functions were enriched within these  
402 genomically plastic regions, we annotated all genes across the 20BP chromosome and  
403 assigned them to predicted functional categories according to GO categories (see methods).  
404 A chi-square test was used to compare the number of genes across the variable regions and  
405 the total number of genes across the entire reference chromosome for each category. Overall,  
406 there was significant difference in the number of genes belonging to 3 categories (Figure 4B).  
407 Specifically, genes predicted with function in the amino acids and derivatives, carbohydrates  
408 and protein metabolism GO categories were significantly depleted in variant regions.

409

410 Rearrangements occurring in two regions were commonly observed, including a 166 kbp  
411 region at ~2.24 – 2.40 Mbp and an 8 kbp region at ~3.07 – 3.08 Mbp identified among four  
412 pairs (3 carriage and 1 reinfection) (Figure 4A). The former region is flanked by *IS91* copies,  
413 carries 207 predicted genes and encodes an incomplete prophage. The reinfection associated  
414 pair sampled 911 days apart displayed duplication of an overlapping region offset by 37 kbp  
415 to the incomplete prophage, also flanked by *IS91* copies (Figure 4A). Regarding the second  
416 region, the 8 kbp region falls within an intact prophage, flanked by homologous *IS1* copies  
417 and contains 11 genes. The majority (10/11) of which encodes for hypothetical proteins and a  
418 predicted Ail/Lom family outer membrane  $\beta$ -barrel protein. By which, the bacterial Ail protein  
419 is a known virulence factor thought to promote host cell invasion (39), and Lom is a phage  
420 protein expressed during lysogeny (40).

421

422 In order to confirm deletion and duplication events as biological and not as an effect of different  
423 sequencing preparations, we performed short read mapping of the Illumina sequenced data  
424 against the 20BP reference genome, which confirmed variation for only one duplicated/deleted  
425 region of 127kbp at 4.17 – 4.22 Mbp (dashed lines, Figure 4A) flanked by rRNA operons at  
426 the borders. This region varied in two carriage pairs, with duplication of this region being  
427 observed in the pair sampled 9 days apart and deletion of the same region observed in the  
428 pair sampled 49 days apart (Supplementary Figure 3). The region contains 37 CDS, including  
429 *ompA* which encodes the outer membrane protein A, a virulence factor involved in facilitating  
430 cell-to-cell spread and a target for vaccine development (41, 42). Although consistency  
431 between Illumina and PacBio data indicates a region that genuinely changed over the course  
432 of infection, this was not in a uniform direction over time and the lack of confirmation of other  
433 regions suggests that some structural variations detected may have arisen either from  
434 different preparations or occurred during sample storage, which was of considerable duration.

435



436 **Discussion**

437

438

439 In the current study, we characterised and compared the accessory genome dynamics of *S.*  
440 *flexneri* and *S. sonnei* isolates associated with both carriage and reinfection, as defined  
441 previously based on SNP typing data and time intervals between serial-isolation (17). Our  
442 results reveal that carriage and reinfection pairs differ, and that SNP distance and the  
443 magnitude of gene content variation correlated, albeit the association was weaker for *S.*  
444 *flexneri*. In general, reinfection associated pairs had greater SNP-distance and varied by a  
445 greater number of genes than carriage pairs.

446

447 The dynamics of accessory genes between carriage and reinfection associated pairs were  
448 examined and showed that for both species, there was a significant difference in gene content  
449 variation between the two pair classes. This supports the concept of a decreased genetic  
450 distance in carriage compared with reinfection associated pairs. Although we have used  
451 working definitions of carriage and reinfection associated within the manuscript to narrate our  
452 study, it is important to note that further clinical and epidemiological data (which is unavailable)  
453 would be required to fully differentiate between persistent carriage or chronic infection, and  
454 reinfection with closely and more distantly related isolates.

455

456 *Shigella* accessory genomes are highly plastic, and the acquisition of AMR genes through  
457 horizontal gene transfer (HGT) have been previously shown to enhance and drive MSM-  
458 associated shigellae epidemics (9, 10). Here, we assessed the gain and loss of AMR genetic  
459 determinants conferring resistance in carriage and reinfection pairs to investigate acquisition  
460 of resistance during persistent infection. We detected acquisition of different extended beta-  
461 lactamase genes in *S. flexneri* and *S. sonnei* carriage associated pairs. Although we were  
462 unable to conclude the origin of both genes, acquisition of AMR genes in *Shigella* have been

463 previously speculated to be facilitated through transfer of plasmid between *Escherichia coli*  
464 within the gut (43-45) and an identical multidrug resistance plasmid isolated from *S. sonnei*  
465 and *E. coli* in a single patient has been reported (46). Thus, acquisition of the AMR genes  
466 within the two carriage pairs within this dataset indicates possible HGT occurring during  
467 persistent infection, possibly from *E. coli*. And, while acquisition of AMR through HGT in  
468 hospital settings has been documented (47), here we have observed AMR gain in patient  
469 infections in a community setting.

470

471 Structural variations and genome rearrangements have played an important role in the  
472 evolution of *Shigella* (48). Thus, aside from changes in the accessory genome it is also  
473 important to consider what larger structural variations and rearrangements may occur during  
474 *Shigella* infection over time. To do this, we examined the genomes of 16 (seven pairs) MSM-  
475 associated *S. flexneri* 3a epidemic sublineage isolates serially sampled at various time  
476 intervals and identified numerous variations and rearrangements. Few regions of the  
477 chromosome demonstrated different types of variation at the same location among different  
478 pairs. These all had IS elements or rRNA operon at the borders, which most likely facilitated  
479 the variation at these regions (49, 50). Functional prediction of genes located within the  
480 structural variant regions revealed depletion of genes involved in key metabolic processes  
481 including amino acids and derivatives, carbohydrates and protein metabolism. Since large  
482 rearrangements can be deleterious (51), it is evident that these genes may be functionally  
483 important for *Shigella*, as they were less prone to structural variation and rearrangements (52).  
484 Mapping of Illumina data confirmed genuine duplication and copy deletion in two carriage  
485 associated pairs at a 127 kbp region, which carries the *ompA* virulence factor. Although  
486 parallel variation demonstrates genomic instability of this region, we do not know if this has an  
487 impact on the virulence phenotype.

488

489 As well as detecting genuine biological variation that occurred over the course of infection, we  
490 detected many structural variations that were artefactual. This may have been from the impact  
491 of distinct sample preparations, or, more likely given that the variations occurred in common  
492 regions across isolates, may have arisen from adaptation/changes during prolonged storage.  
493 The most prominent category of artefactual variation was the deletion of a 166 kbp prophage  
494 region in six PacBio sequenced genomes. Illumina data generated from different DNA  
495 preparation revealed this region was in fact present in the original isolates. Since there was  
496 considerable duration between the DNA preparations, the loss of this region exclusively in the  
497 PacBio sequenced genomes could be due to the loss of selection for genes whose function  
498 are no longer required within the storage environment, whereby genes with dispensable  
499 function are discarded (53, 54). Such events have been shown to play an important part in the  
500 convergent evolution of *Shigella* species as a host-restricted pathogen (48). The deletion of  
501 this region under the storage environment but retention in the clinical environment suggests  
502 genes in this region may have functions contributing to infection and/or ecological interaction,  
503 and thus warrants further investigation. Furthermore, this highlights the importance of well  
504 stored samples for the inclusion in studies and due caution when examining large-scale  
505 genomic rearrangements.

506

507 In summary, we have utilised isolate pairs occurring in a comparatively new infection setting  
508 for *Shigella* to characterise the accessory genome dynamics that occur in persistent infection  
509 (and contrasted this with reinfections). We showed an overall gain of AMR across isolate pairs,  
510 consistent with population trends of AMR among MSM-associated shigellae. We also detected  
511 structural variation in carriage associated pairs over time and found that some structural  
512 changes were the result of storage/preparation artefact, both of which may have biological  
513 relevance. It is worth noting that due to the limited sampling intervals and methodology  
514 applied, we will not have captured all possible variations (i.e transient, small and single gene  
515 variant). However, we have provided novel insights to large structural chromosomal variations

516 in *Shigella* over time, and this is an important step in trying to understand how the pathogen  
517 might adapt during persistent infection. Finally, our study additionally highlights the need for  
518 appropriate controls in genome studies and the storage of high-quality reference isolates. To  
519 that end, we have deposited the cognate strain for the 20PB reference genome of the  
520 intercontinentally transmitting *S. flexneri* 3a in NCTC.

521

## 522 **Acknowledgements**

523 This work was supported by a UKRI MRC NIRG award (MR/R020787/1) and a technology  
524 directorate voucher from the University of Liverpool. KSB is supported by a Wellcome Trust  
525 Clinical Research Career Development Award (106690/A/14/Z). The authors are grateful to  
526 Sam Haldenby, Matthew Gemmell and Richard Gregory at the Centre for Genomics  
527 Research, University of Liverpool for technical support.

## Reference

1. Liu J, Platts-Mills JA, Juma J, Kabir F, Nkeze J, Okoi C, et al. Use of quantitative molecular diagnostic methods to identify causes of diarrhoea in children: a reanalysis of the GEMS case-control study. *Lancet*. 2016;388(10051):1291-301.
2. Baker KS, Dallman TJ, Ashton PM, Day M, Hughes G, Crook PD, et al. Intercontinental dissemination of azithromycin-resistant shigellosis through sexual transmission: a cross-sectional study. *Lancet Infect Dis*. 2015;15(8):913-21.
3. Simms I, Field N, Jenkins C, Childs T, Gilbert VL, Dallman TJ, et al. Intensified shigellosis epidemic associated with sexual transmission in men who have sex with men--*Shigella flexneri* and *S. sonnei* in England, 2004 to end of February 2015. *Euro Surveill*. 2015;20(15).
4. Ingle DJ, Easton M, Valcanis M, Seemann T, Kwong JC, Stephens N, et al. Co-circulation of Multidrug-resistant *Shigella* Among Men Who Have Sex With Men in Australia. *Clin Infect Dis*. 2019;69(9):1535-44.
5. Chung The H, Boinett C, Pham Thanh D, Jenkins C, Weill FX, Howden BP, et al. Dissecting the molecular evolution of fluoroquinolone-resistant *Shigella sonnei*. *Nat Commun*. 2019;10(1):4828.
6. Holt KE, Baker S, Weill FX, Holmes EC, Kitchen A, Yu J, et al. *Shigella sonnei* genome sequencing and phylogenetic analysis indicate recent global dissemination from Europe. *Nat Genet*. 2012;44(9):1056-9.
7. Hoffmann C, Sahly H, Jessen A, Ingiliz P, Stellbrink HJ, Neifer S, et al. High rates of quinolone-resistant strains of *Shigella sonnei* in HIV-infected MSM. *Infection*. 2013;41(5):999-1003.

8. Gaudreau C, Ratnayake R, Pilon PA, Gagnon S, Roger M, Levesque S. Ciprofloxacin-resistant *Shigella sonnei* among men who have sex with men, Canada, 2010. *Emerg Infect Dis.* 2011;17(9):1747-50.
9. Baker KS, Dallman TJ, Field N, Childs T, Mitchell H, Day M, et al. Horizontal antimicrobial resistance transfer drives epidemics of multiple *Shigella* species. *Nat Commun.* 2018;9(1):1462.
10. Bardsley M, Jenkins C, Mitchell HD, Mikhail AFW, Baker KS, Foster K, et al. Persistent Transmission of Shigellosis in England Is Associated with a Recently Emerged Multidrug-Resistant Strain of *Shigella sonnei*. *J Clin Microbiol.* 2020;58(4).
11. Baer JT, Vugia DJ, Reingold AL, Aragon T, Angulo FJ, Bradford WZ. HIV infection as a risk factor for shigellosis. *Emerg Infect Dis.* 1999;5(6):820-3.
12. Aragon TJ, Vugia DJ, Shallow S, Samuel MC, Reingold A, Angulo FJ, et al. Case-control study of shigellosis in San Francisco: the role of sexual transmission and HIV infection. *Clin Infect Dis.* 2007;44(3):327-34.
13. Barry EM, Pasetti MF, Sztein MB, Fasano A, Kotloff KL, Levine MM. Progress and pitfalls in *Shigella* vaccine research. *Nat Rev Gastroenterol Hepatol.* 2013;10(4):245-55.
14. Cohen D, Bassal R, Goren S, Rouach T, Taran D, Schemberg B, et al. Recent trends in the epidemiology of shigellosis in Israel. *Epidemiol Infect.* 2014;142(12):2583-94.
15. Lerman Y, Yavzori M, Ambar R, Sechter I, Wiener M, Cohen D. Epidemic spread of *Shigella sonnei* shigellosis and evidence for development of immunity among children attending day-care centers in a communal settlement (Kibbutz). *J Clin Microbiol.* 1994;32(4):1092-4.
16. Simor AE, Poon R, Borczyk A. Chronic *Shigella flexneri* infection preceding development of acquired immunodeficiency syndrome. *J Clin Microbiol.* 1989;27(2):353-5.
17. Allen H, Mitchell HD, Simms I, Baker KS, Foster K, Hughes G, et al. Evidence for re-infection and persistent carriage of *Shigella* species in adult males reporting domestically acquired infection in England. *Clin Microbiol Infect.* 2020.

18. Dallman TJ, Chattaway MA, Mook P, Godbole G, Crook PD, Jenkins C. Use of whole-genome sequencing for the public health surveillance of *Shigella sonnei* in England and Wales, 2015. *J Med Microbiol.* 2016;65(8):882-4.
19. Chattaway MA, Greig DR, Gentle A, Hartman HB, Dallman TJ, Jenkins C. Whole-Genome Sequencing for National Surveillance of *Shigella flexneri*. *Front Microbiol.* 2017;8:1700.
20. Bolger AM, Lohse M, Usadel B. Trimmomatic: a flexible trimmer for Illumina sequence data. *Bioinformatics.* 2014;30(15):2114-20.
21. Wick RR, Judd LM, Gorrie CL, Holt KE. Unicycler: resolving bacterial genome assemblies from short and long sequencing reads. *PLoS computational biology.* 2017;13(6):e1005595.
22. Koren S, Walenz BP, Berlin K, Miller JR, Bergman NH, Phillippy AM. Canu: scalable and accurate long-read assembly via adaptive k-mer weighting and repeat separation. *Genome Res.* 2017;27(5):722-36.
23. Quinlan AR, Hall IM. BEDTools: a flexible suite of utilities for comparing genomic features. *Bioinformatics.* 2010;26(6):841-2.
24. Seemann T. Prokka: rapid prokaryotic genome annotation. *Bioinformatics.* 2014;30(14):2068-9.
25. Page AJ, Cummins CA, Hunt M, Wong VK, Reuter S, Holden MT, et al. Roary: rapid large-scale prokaryote pan genome analysis. *Bioinformatics.* 2015;31(22):3691-3.
26. Bushnell B. BBMap: a fast, accurate, splice-aware aligner. Lawrence Berkeley National Lab.(LBNL), Berkeley, CA (United States); 2014.
27. Feldgarden M, Brover V, Haft DH, Prasad AB, Slotta DJ, Tolstoy I, et al. Validating the AMRFinder Tool and Resistance Gene Database by Using Antimicrobial Resistance Genotype-Phenotype Correlations in a Collection of Isolates. *Antimicrob Agents Chemother.* 2019;63(11).

28. Carattoli A, Zankari E, Garcia-Fernandez A, Voldby Larsen M, Lund O, Villa L, et al. In silico detection and typing of plasmids using PlasmidFinder and plasmid multilocus sequence typing. *Antimicrob Agents Chemother*. 2014;58(7):3895-903.
29. Li H. Aligning sequence reads, clone sequences and assembly contigs with BWA-MEM. arXiv preprint arXiv:13033997. 2013.
30. Arndt D, Grant JR, Marcu A, Sajed T, Pon A, Liang Y, et al. PHASTER: a better, faster version of the PHAST phage search tool. *Nucleic Acids Res*. 2016;44(W1):W16-21.
31. Goel M, Sun H, Jiao WB, Schneeberger K. SyRI: finding genomic rearrangements and local sequence differences from whole-genome assemblies. *Genome Biol*. 2019;20(1):277.
32. Carver TJ, Rutherford KM, Berriman M, Rajandream MA, Barrell BG, Parkhill J. ACT: the Artemis Comparison Tool. *Bioinformatics*. 2005;21(16):3422-3.
33. Carver T, Harris SR, Berriman M, Parkhill J, McQuillan JA. Artemis: an integrated platform for visualization and analysis of high-throughput sequence-based experimental data. *Bioinformatics*. 2012;28(4):464-9.
34. Krzywinski M, Schein J, Birol I, Connors J, Gascoyne R, Horsman D, et al. Circos: an information aesthetic for comparative genomics. *Genome Res*. 2009;19(9):1639-45.
35. Xie Z, Tang H. ISEScan: automated identification of insertion sequence elements in prokaryotic genomes. *Bioinformatics*. 2017;33(21):3340-7.
36. Aziz RK, Bartels D, Best AA, DeJongh M, Disz T, Edwards RA, et al. The RAST Server: rapid annotations using subsystems technology. *BMC Genomics*. 2008;9:75.
37. Meyer F, Overbeek R, Rodriguez A. FIGfams: yet another set of protein families. *Nucleic Acids Res*. 2009;37(20):6643-54.
38. McKnight PE, Najab J. Mann-Whitney U Test. *The Corsini encyclopedia of psychology*. 2010:1-.
39. Miller VL, Beer KB, Heusipp G, Young BM, Wachtel MR. Identification of regions of Ail required for the invasion and serum resistance phenotypes. *Mol Microbiol*. 2001;41(5):1053-62.



40. Barondess JJ, Beckwith J. A bacterial virulence determinant encoded by lysogenic coliphage lambda. *Nature*. 1990;346(6287):871-4.
41. Pore D, Chakrabarti MK. Outer membrane protein A (OmpA) from *Shigella flexneri* 2a: a promising subunit vaccine candidate. *Vaccine*. 2013;31(36):3644-50.
42. Ambrosi C, Pompili M, Scribano D, Zagaglia C, Ripa S, Nicoletti M. Outer membrane protein A (OmpA): a new player in *shigella flexneri* protrusion formation and inter-cellular spreading. *PLoS One*. 2012;7(11):e49625.
43. Bratoeva MP, John JF, Jr. In vivo R-plasmid transfer in a patient with a mixed infection of *shigella* dysentery. *Epidemiol Infect*. 1994;112(2):247-52.
44. Rashid H, Rahman M. Possible transfer of plasmid mediated third generation cephalosporin resistance between *Escherichia coli* and *Shigella sonnei* in the human gut. *Infect Genet Evol*. 2015;30:15-8.
45. Baker KS, Dallman TJ, Thomson NR, Jenkins C. An outbreak of a rare Shiga-toxin-producing *Escherichia coli* serotype (O117:H7) among men who have sex with men. *Microb Genom*. 2018;4(7).
46. Thanh Duy P, Thi Nguyen TN, Vu Thuy D, Chung The H, Alcock F, Boinett C, et al. Commensal *Escherichia coli* are a reservoir for the transfer of XDR plasmids into epidemic fluoroquinolone-resistant *Shigella sonnei*. *Nat Microbiol*. 2020;5(2):256-64.
47. Conlan S, Thomas PJ, Deming C, Park M, Lau AF, Dekker JP, et al. Single-molecule sequencing to track plasmid diversity of hospital-associated carbapenemase-producing *Enterobacteriaceae*. *Sci Transl Med*. 2014;6(254):254ra126.
48. Yang F, Yang J, Zhang X, Chen L, Jiang Y, Yan Y, et al. Genome dynamics and diversity of *Shigella* species, the etiologic agents of bacillary dysentery. *Nucleic Acids Res*. 2005;33(19):6445-58.
49. Raeside C, Gaffe J, Deatherage DE, Tenailon O, Briska AM, Ptashkin RN, et al. Large chromosomal rearrangements during a long-term evolution experiment with *Escherichia coli*. *mBio*. 2014;5(5):e01377-14.

50. Darmon E, Leach DR. Bacterial genome instability. *Microbiol Mol Biol Rev.* 2014;78(1):1-39.
51. Rocha EP. The organization of the bacterial genome. *Annu Rev Genet.* 2008;42:211-33.
52. Jordan IK, Rogozin IB, Wolf YI, Koonin EV. Essential genes are more evolutionarily conserved than are nonessential genes in bacteria. *Genome Res.* 2002;12(6):962-8.
53. Ochman H, Moran NA. Genes lost and genes found: evolution of bacterial pathogenesis and symbiosis. *Science.* 2001;292(5519):1096-9.
54. Lee MC, Marx CJ. Repeated, selection-driven genome reduction of accessory genes in experimental populations. *PLoS Genet.* 2012;8(5):e1002651.

## Figures and Tables

**Table 1.** Number of isolate pairs analysed in the current study, broken down by *Shigella* serotypes and classification as carriage associated or reinfection associated.

| <b>Serotype</b>       | <b>Carriage associated pairs</b> | <b>Reinfection associated pairs</b> | <b>Total pairs</b> |
|-----------------------|----------------------------------|-------------------------------------|--------------------|
| <i>S. flexneri</i> 2a | 14                               | 5                                   | 19                 |
| <i>S. flexneri</i> 3a | 8                                | 7                                   | 15                 |
| <i>S. sonnei</i>      | 15                               | 8                                   | 23                 |

**Table 2.** Variation in antimicrobial resistance genes detected among paired isolates of *S. flexneri* and *S. sonnei*.

| Reinfection/<br>Carriage | Species                  | Case<br>ID       | Intervals<br>(days) | MDR<br>plasmid<br>gained* | MDR<br>plasmid<br>lost** | AMR genetic<br>determinants<br>associated                                |
|--------------------------|--------------------------|------------------|---------------------|---------------------------|--------------------------|--------------------------------------------------------------------------|
| Carriage                 | <i>S. flexneri</i><br>3a | F                | 27                  |                           | pCERC1                   | <i>dfrA14, sul2, strA/B</i>                                              |
|                          |                          | O                | 83                  |                           | pCERC1                   | <i>sul2, strA/B</i>                                                      |
|                          | <i>S. flexneri</i><br>2a | I                | 6                   |                           |                          | <i>blaSHV-12</i>                                                         |
|                          | <i>S. sonnei</i>         | L                | 35                  |                           |                          | <i>blaTEM-1</i>                                                          |
| Reinfection              | <i>S. flexneri</i><br>2a | A                | 1142                | pKSR100                   |                          | <i>mph(A), blaTEM-1, dfrA17, sul1, aadA5</i>                             |
|                          |                          | C                | 496                 |                           | pCERC1                   | <i>dfrA14, sul2, strA/B</i>                                              |
|                          | <i>S. flexneri</i><br>3a | C                | 805                 | pKSR100                   |                          | <i>erm(B), mph(A), blaTEM-1</i>                                          |
|                          |                          | E                | 193                 |                           | pKSR100<br>integron      | <i>dfrA17, sul1, aadA5</i>                                               |
|                          |                          | I                | 1862                | pKSR100                   |                          | <i>erm(B), mph(A), blaTEM-1</i>                                          |
|                          |                          | D                | 1099                |                           | pCERC1                   | <i>dfrA14, sul2, strA/B</i>                                              |
|                          |                          | J                | 905                 | pKSR100                   | pCERC1                   | <i>mph(A), blaTEM-1, dfrA17, sul1, aadA5, dfrA14, sul2, strA/B</i>       |
|                          |                          | <i>S. sonnei</i> | B                   | 925                       | spA                      |                                                                          |
|                          | <i>S. sonnei</i>         | C                | 1409                | spA,<br>pKSR100           |                          | <i>strA/B, sul2, tetA, blaTEM-1, erm(B), aadA5, dfrA17, sul1, mph(A)</i> |
|                          | <i>S. sonnei</i>         | D                | 42                  |                           | spA                      | <i>strA/B, sul2, tetA</i>                                                |
|                          | <i>S. sonnei</i>         | G                | 1208                | spA,<br>pKSR100           |                          | <i>strA/B, sul2, tetA, blaTEM-1, erm(B), aadA5, dfrA17, sul1, mph(A)</i> |
|                          | <i>S. sonnei</i>         | I                | 659                 | pKSR100                   |                          | <i>blaTEM-1, erm(B), mph(A)</i>                                          |
|                          | <i>S. sonnei</i>         | J                | 481                 | pKSR100                   |                          | <i>blaTEM-1, erm(B), mph(A)</i>                                          |
|                          | <i>S. sonnei</i>         | V                | 184                 |                           |                          | <i>aadA1</i>                                                             |

For reinfection associated pairs, \* plasmid gained is defined as the plasmid being present in the second isolate but absent in the first isolate of the pair, and \*\* plasmid lost is defined as the plasmid being absent in the second isolate but present in the first isolate of the pair.

**Table S3.** Number of CDS annotated from draft genome assemblies generated from synthetic reads of various length and insert size.

| <b>Reference genome</b>                    | <b>Read length (bp)</b> | <b>Insert size</b> | <b>CDS number</b> |
|--------------------------------------------|-------------------------|--------------------|-------------------|
| <i>S. flexneri</i> 20BP<br>(GCA_904066025) | 36 - 100                | 22-428             | 4215              |
|                                            | 40 - 100                | 30-420             | 4217              |
|                                            | 50 - 80                 | 90-360             | 4215              |
|                                            | 60 - 90                 | 90-360             | 4215              |
|                                            | 70 - 100                | 90-360             | 4234              |
|                                            | 80 - 100                | 110-340            | 4230              |
|                                            | 90 - 100                | 130-320            | 4230              |
| <i>S. sonnei</i> (GCA_000092525.1)         | 36 - 100                | 22-428             | 4230              |
|                                            | 40 - 100                | 30-420             | 4228              |
|                                            | 50 - 80                 | 90-360             | 4233              |
|                                            | 60 - 90                 | 90-360             | 4232              |
|                                            | 70 - 100                | 90-360             | 4238              |
|                                            | 80 - 100                | 110-340            | 4238              |
|                                            | 90 - 100                | 130-320            | 4247              |

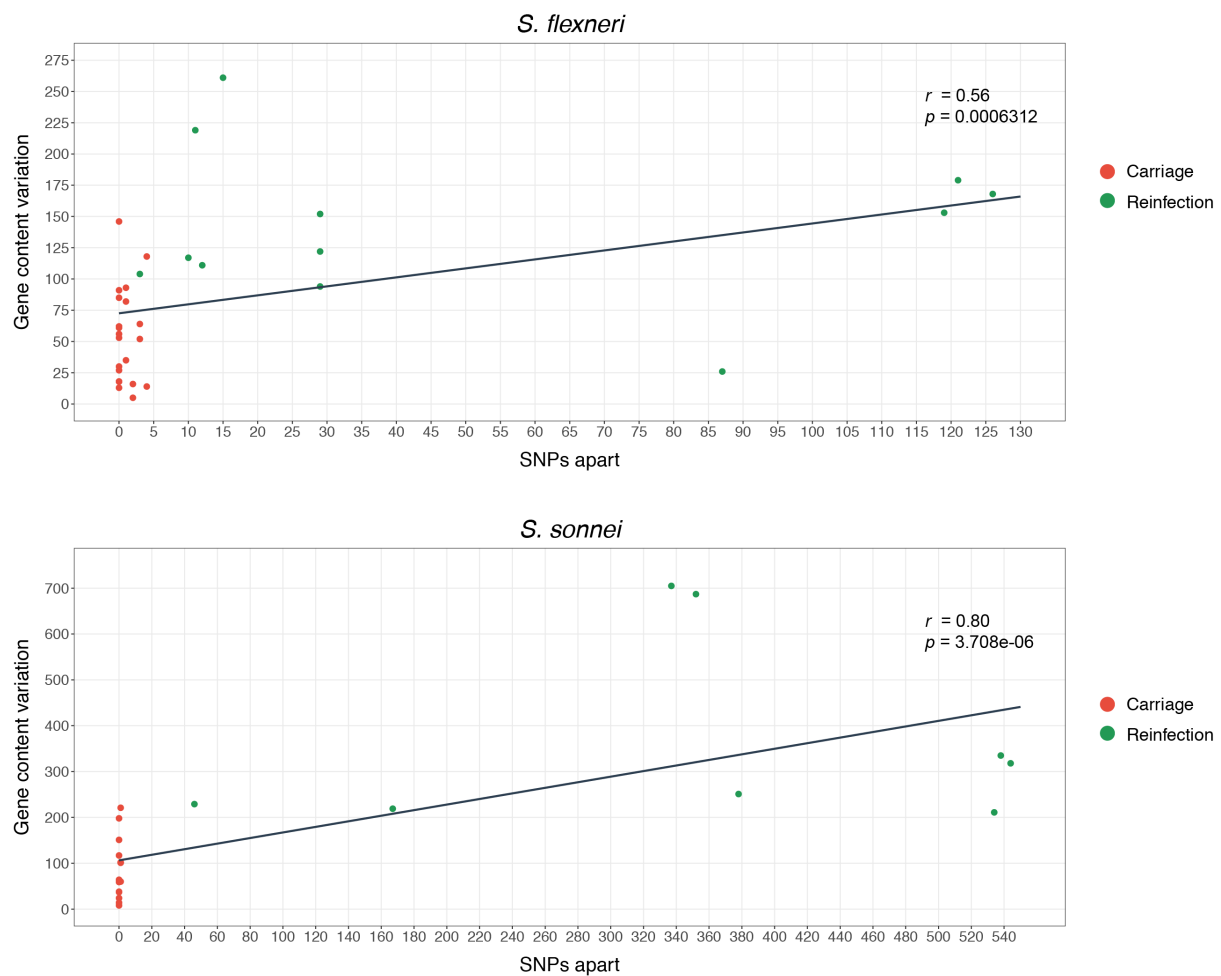

**Figure 1.** Association of gene content variation with SNP distance for (A) 35 *S. flexneri* and (B) 23 *S. sonnei* pairs of isolates sampled at two-time intervals. Each dot represents a pair of isolates, by which the gene content variations between the isolates are plotted along the y-axis and the SNP distance between the isolates along the x-axis. Pairs are coloured by classification according to inlaid key which revealed difference in pattern among carriage and reinfection associated pairs, for both species. Spearman's rank correlation coefficient value is displayed on the top right.

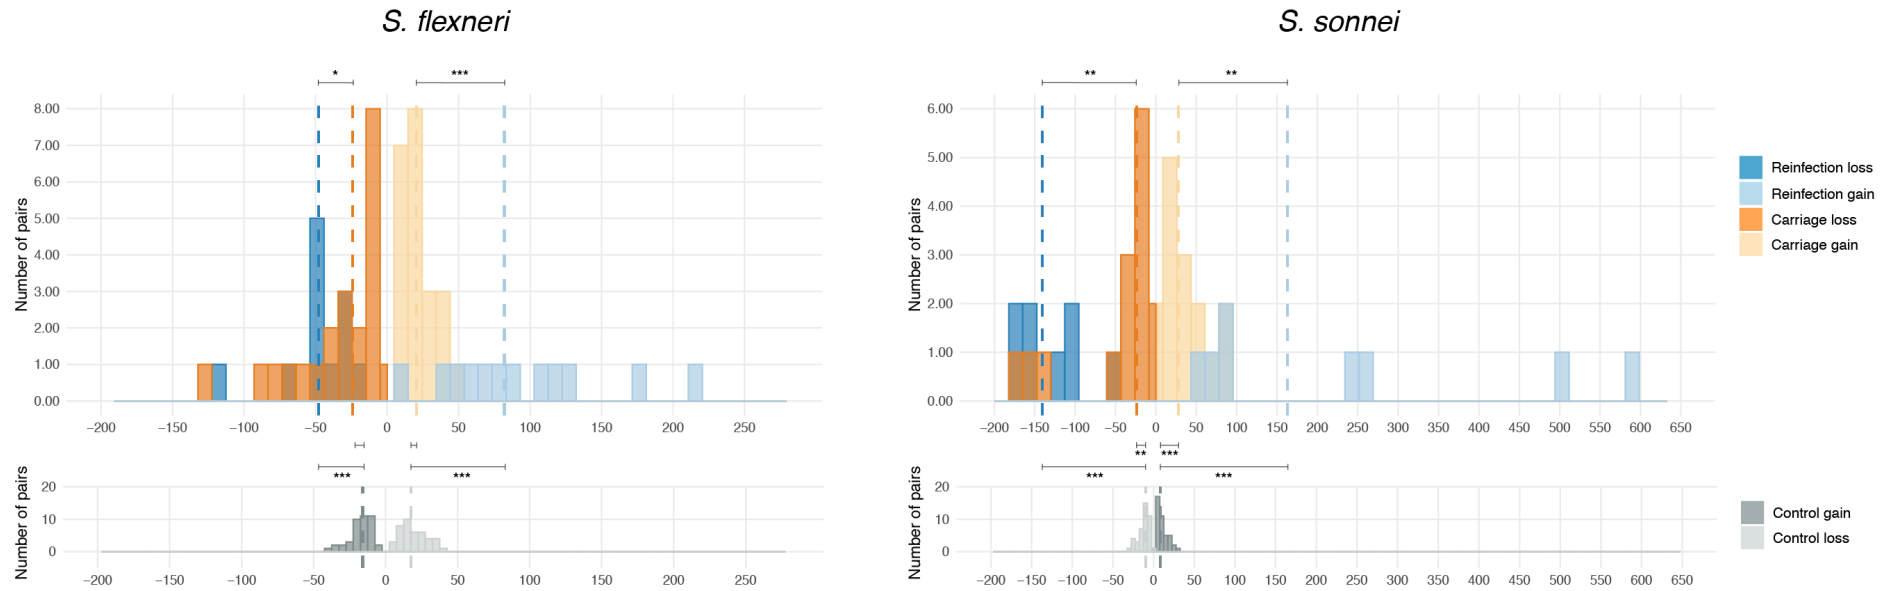

**Figure 2. Distribution of the scale of accessory gene variation among paired isolates associated with carriage and reinfection in *S. flexneri* and *S. sonnei*.** Frequency histogram plots show the number of accessory genes varying among isolate pairs. Genes present in the earlier serial isolate, but absent in the later are plotted as negative values (genes lost) and genes absent in the first, but present in the second isolate are plotted as positive values (genes gained). Variations derived from carriage or reinfection associated pairs are coloured according to

the inlaid key, median values of distributions are shown as dashed vertical lines. Frequency histogram plots of *in silico* controls, showing intra-genome stochastic variation generated due to assembly, annotation and clustering are displayed below. Statistical differences between carriage and reinfection associated pairs, *in silico* controls and empirical data were tested using Mann-Whitney U tests, asterisks representing significance code \*  $p < 0.05$ , \*\*  $p < 0.005$  and \*\*\*  $p < 0.0005$



(A)

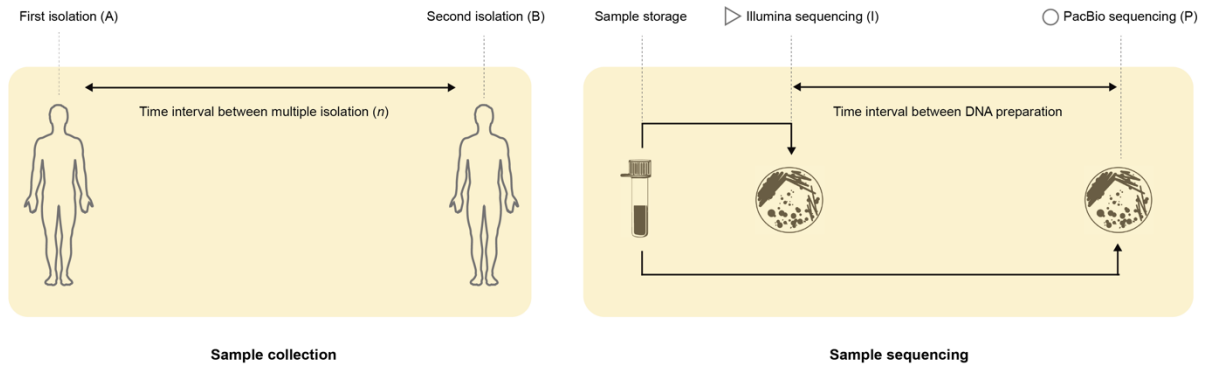

(B)

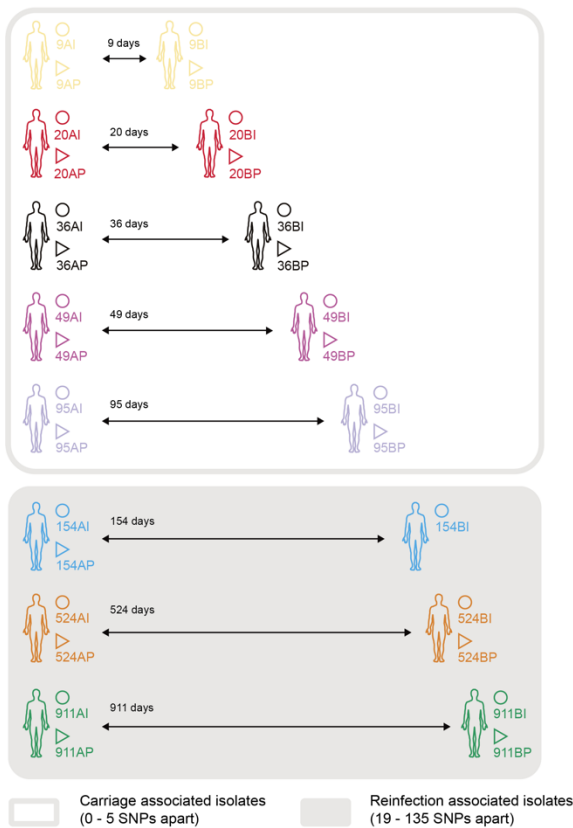

(C)

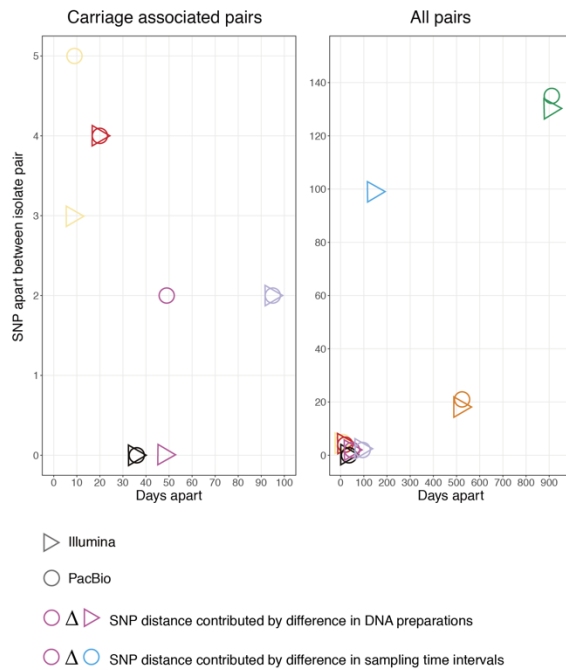

**Figure 3. Sampling time points and sequencing technologies used to investigate large structural variation of *S. flexneri* 3a genomes over time.** (A) Isolates from each pair were serially sampled from the same patient. Following data collection, the samples were stored and later Illumina sequenced. After a considerable amount of time (e.g. several years), the samples were revived and PacBio sequenced. (B) Serial isolation of *S. flexneri* 3a was

performed across 8 patients sampled between 9 and 911 days apart. Names of genome data used in the current study are presented in the diagram according to its abbreviation. (C) The plots display SNP distance and days apart between serial sampling of the *S. flexneri* 3a isolate pairs. Each shape on the plot represents variations between an isolate pair. The colour of each shape represents the time interval between sampling of an isolate pair, as demonstrated in (B). Different shapes represent the sequencing technology used according to the inlaid key. Plot on the left contain carriage associated pairs and plot on the right contain all isolate pairs analysed in this study. This revealed distinctive clustering, by which pairs associated with carriage are isolated at shorter time interval with less SNPs apart than compared to reinfection associated pairs.

(A)

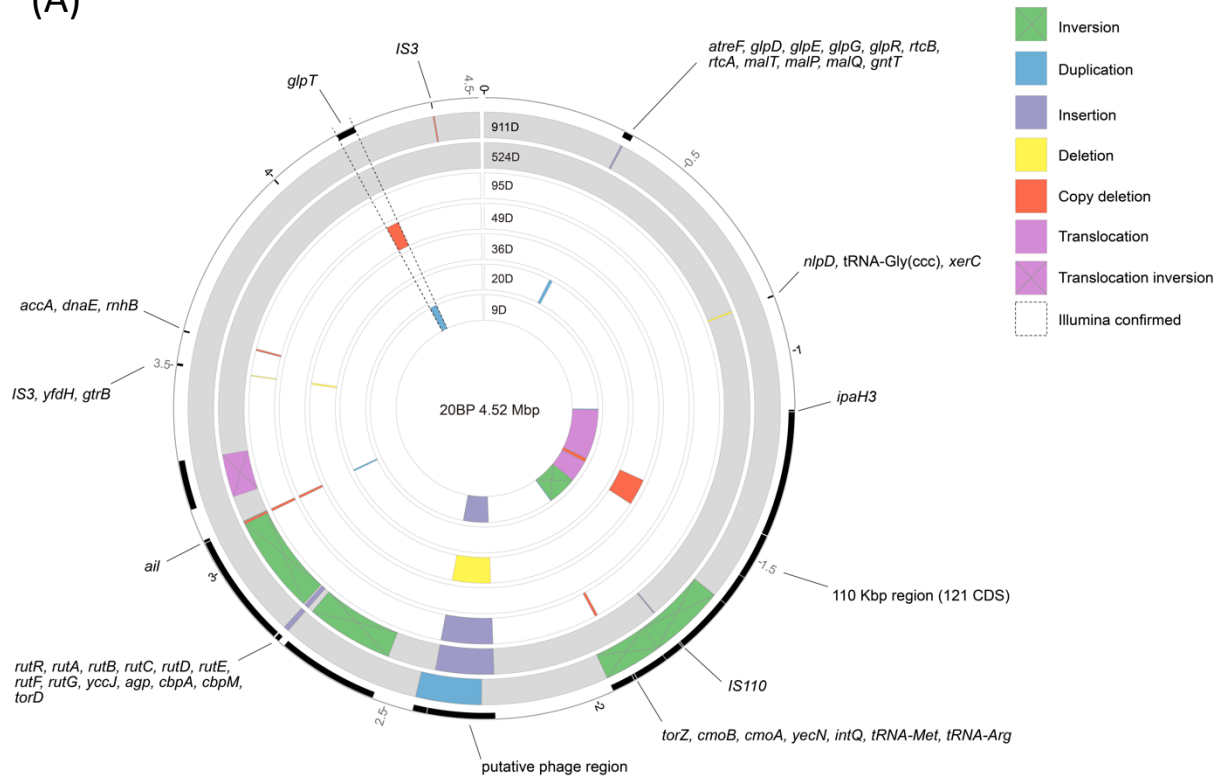

(B)

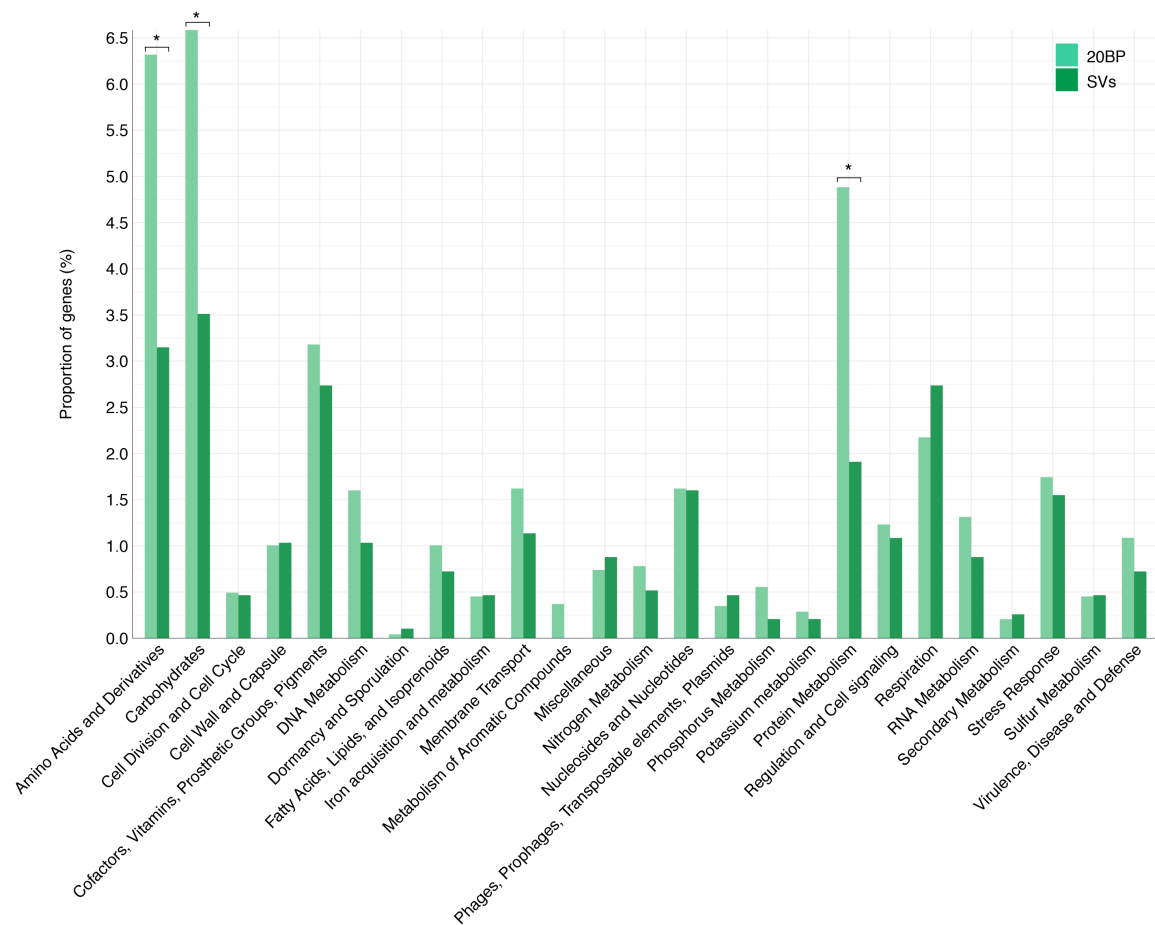

**Figure 4. Chromosomal structural variation detected among seven pairs of serially-isolated MSM-associated *S. flexneri* 3a isolates and functional annotation for genes and prediction of the GO category by RAST.** (A) The concentric rings represent pairwise comparisons between PacBio generated genomes, with the time interval in days overlaid at uppermost and increasing in out circles. Genomes of two isolate pairs associated with reinfection (rather than carriage) are highlighted in grey. Overlaid are coloured blocks according to the inlaid key indicating the nature and frame of structural variations. The outermost track displays predicted genes within regions of structural variations (genes encoding for hypothetical proteins are not annotated). Duplication and deletion events confirmed by both Illumina and PacBio data are highlighted in dashed lines. (B) The proportion of genes in GO categories annotated by RAST for 20BP reference chromosome (light green bars) and structural variable regions (dark green bars). GO categories which have significant ( $p < 0.05$ ) difference in proportion of genes are indicated by an asterisk. Genes unable to be assigned to a category are not displayed, which represented 59% for 20BP reference chromosome and 72% for regions of structural variation.

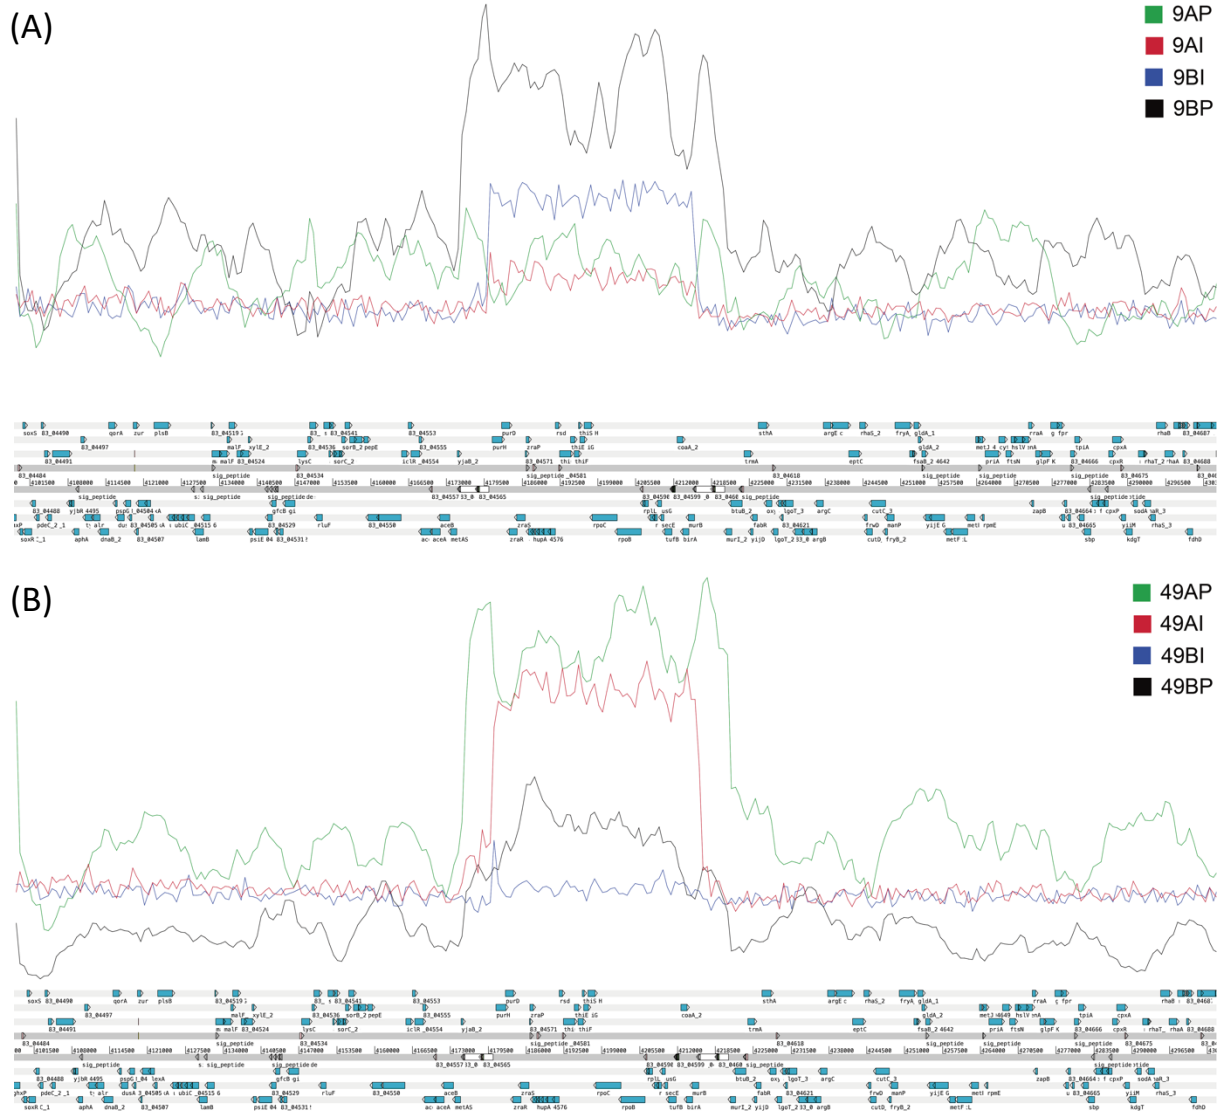

**Supplementary Figure 3.** Mapping of short and long reads of a 127 kbp region at 4.17 – 4.22 Mbp confirming duplication/deletion events. (A) Reads of isolates sampled at 9 days interval were mapped against complete reference sequence of 20BP, which confirmed duplication of the region in the isolate sampled at the second time interval. (B) Reads of isolates sampled at 49 days interval, confirmed copy deletion of the same region in the isolate sampled at the second time interval.
